# Supplementary material
Source: publisher figshare collection journal article supplement (https://acs.figshare.com/ndownloader/files/4140079)

# checkCIF/PLATON report

You have not supplied any structure factors. As a result the full set of tests cannot be run.

No syntax errors found.      CIF dictionary      Interpreting this report

## Datablock: 4b

---

|                 |                          |                          |              |
|-----------------|--------------------------|--------------------------|--------------|
| Bond precision: | C-C = 0.0029 A           | Wavelength=0.71073       |              |
| Cell:           | a=15.5497(7)             | b=14.4945(7)             | c=12.9298(6) |
|                 | alpha=90                 | beta=102.3006(6)         | gamma=90     |
| Temperature:    | 173 K                    |                          |              |
|                 | Calculated               | Reported                 |              |
| Volume          | 2847.3(2)                | 2847.3(2)                |              |
| Space group     | P 21/c                   | P 21/c                   |              |
| Hall group      | -P 2ybc                  | -P 2ybc                  |              |
| Moiety formula  | C20 H29 N5, 2(C F3 O3 S) | C20 H29 N5, 2(C F3 O3 S) |              |
| Sum formula     | C22 H29 F6 N5 O6 S2      | C22 H29 F6 N5 O6 S2      |              |
| Mr              | 637.64                   | 637.62                   |              |
| Dx,g cm-3       | 1.487                    | 1.487                    |              |
| Z               | 4                        | 4                        |              |
| Mu (mm-1)       | 0.272                    | 0.272                    |              |
| F000            | 1320.0                   | 1320.0                   |              |
| F000'           | 1321.86                  |                          |              |
| h,k,lmax        | 19,18,16                 | 19,18,16                 |              |
| Nref            | 5837                     | 5831                     |              |
| Tmin,Tmax       | 0.880,0.989              | 0.883,0.989              |              |
| Tmin'           | 0.880                    |                          |              |

Correction method= INTEGRATION

Data completeness= 0.999      Theta(max)= 26.400

R(reflections)= 0.0361( 4762)      wR2(reflections)= 0.0968( 5831)

S = 1.021      Npar= 372

---

The following ALERTS were generated. Each ALERT has the format

**test-name\_ALERT\_alert-type\_alert-level.**

Click on the hyperlinks for more details of the test.

---

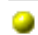

### Alert level C

|                   |                   |   |                                  |           |
|-------------------|-------------------|---|----------------------------------|-----------|
| PLAT220_ALERT_2_C | Large Non-Solvent | C | Ueq(max)/Ueq(min) ...            | 3.7 Ratio |
| PLAT242_ALERT_2_C | Check Low         |   | Ueq as Compared to Neighbors for | C15       |
| PLAT242_ALERT_2_C | Check Low         |   | Ueq as Compared to Neighbors for | C18       |

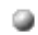

## Alert level G

PLAT005\_ALERT\_5\_G No \_iucr\_refine\_instructions\_details in CIF .... ?  
PLAT432\_ALERT\_2\_G Short Inter X...Y Contact O5 .. C6 .. 2.98 Ang.  
PLAT432\_ALERT\_2\_G Short Inter X...Y Contact O5 .. C4 .. 2.99 Ang.

0 **ALERT level A** = Most likely a serious problem - resolve or explain  
0 **ALERT level B** = A potentially serious problem, consider carefully  
3 **ALERT level C** = Check. Ensure it is not caused by an omission or oversight  
3 **ALERT level G** = General information/check it is not something unexpected

0 ALERT type 1 CIF construction/syntax error, inconsistent or missing data  
5 ALERT type 2 Indicator that the structure model may be wrong or deficient  
0 ALERT type 3 Indicator that the structure quality may be low  
0 ALERT type 4 Improvement, methodology, query or suggestion  
1 ALERT type 5 Informative message, check

## Datablock: 5b

Bond precision: C-C = 0.0031 A

Wavelength=0.71073

Cell: a=10.1647(5) b=10.4449(5) c=13.1034(6)  
alpha=76.4620(5) beta=72.6898(5) gamma=78.6303(5)

Temperature: 173 K

|                | Calculated          | Reported            |
|----------------|---------------------|---------------------|
| Volume         | 1279.03(11)         | 1279.03(11)         |
| Space group    | P -1                | P -1                |
| Hall group     | -P 1                | -P 1                |
| Moiety formula | C22 H30 I2 N5 O2 Rh | C22 H30 I2 N5 O2 Rh |
| Sum formula    | C22 H30 I2 N5 O2 Rh | C22 H30 I2 N5 O2 Rh |
| Mr             | 753.22              | 753.22              |
| Dx,g cm-3      | 1.956               | 1.956               |
| Z              | 2                   | 2                   |
| Mu (mm-1)      | 3.109               | 3.109               |
| F000           | 728.0               | 728.0               |
| F000'          | 724.08              |                     |
| h,k,lmax       | 13,13,17            | 13,13,17            |
| Nref           | 5855                | 5814                |
| Tmin,Tmax      | 0.449,0.856         | 0.487,0.855         |
| Tmin'          | 0.415               |                     |

Correction method= NUMERICAL

Data completeness= 0.993

Theta(max)= 27.480

R(reflections)= 0.0172( 5305)

wR2(reflections)= 0.0436( 5814)

S = 1.036

Npar= 292

---

The following ALERTS were generated. Each ALERT has the format

**test-name\_ALERT\_alert-type\_alert-level.**

Click on the hyperlinks for more details of the test.

---

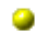

#### Alert level C

PLAT411\_ALERT\_2\_C Short Inter H...H Contact H5 .. H20 .. 2.14 Ang.

---

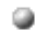

#### Alert level G

PLAT005\_ALERT\_5\_G No \_iucr\_refine\_instructions\_details in CIF .... ?  
PLAT232\_ALERT\_2\_G Hirshfeld Test Diff (M-X) I2 -- Rh .. 12.7 su  
PLAT232\_ALERT\_2\_G Hirshfeld Test Diff (M-X) Rh -- O1 .. 5.0 su  
PLAT232\_ALERT\_2\_G Hirshfeld Test Diff (M-X) Rh -- C4 .. 5.6 su

---

0 **ALERT level A** = Most likely a serious problem - resolve or explain  
0 **ALERT level B** = A potentially serious problem, consider carefully  
1 **ALERT level C** = Check. Ensure it is not caused by an omission or oversight  
4 **ALERT level G** = General information/check it is not something unexpected

0 ALERT type 1 CIF construction/syntax error, inconsistent or missing data  
4 ALERT type 2 Indicator that the structure model may be wrong or deficient  
0 ALERT type 3 Indicator that the structure quality may be low  
0 ALERT type 4 Improvement, methodology, query or suggestion  
1 ALERT type 5 Informative message, check

---

## Datablock: 7b

---

Bond precision: C-C = 0.0214 A

Wavelength=0.71073

Cell: a=30.695(19) b=17.496(11) c=15.149(9)

alpha=90 beta=119.530(7) gamma=90

Temperature: 173 K

|                | Calculated                | Reported                     |
|----------------|---------------------------|------------------------------|
| Volume         | 7079(8)                   | 7079(7)                      |
| Space group    | C 2/c                     | C2/c                         |
| Hall group     | -C 2yc                    | -C 2yc                       |
| Moiety formula | C20 H28 I3 N5 Pd, C2 H3 N | C20 H28 I3 N5 Pd, 4(C2 H3 N) |
| Sum formula    | C22 H31 I3 N6 Pd          | C28 H40 I3 N9 Pd             |
| Mr             | 866.63                    | 989.79                       |
| Dx,g cm-3      | 1.626                     | 1.857                        |
| Z              | 8                         | 8                            |
| Mu (mm-1)      | 3.158                     | 3.173                        |
| F000           | 3280.0                    | 3808.0                       |
| F000'          | 3261.53                   |                              |
| h,k,lmax       | 38,21,18                  | 38,21,18                     |
| Nref           | 7250                      | 7143                         |
| Tmin,Tmax      | 0.664,0.752               | 0.252,0.757                  |
| Tmin'          | 0.148                     |                              |

Correction method= NUMERICAL

Data completeness= 0.985

Theta(max)= 26.400

R(reflections)= 0.0734( 4484)

wR2(reflections)= 0.2186( 7143)

S = 1.080

Npar= 288

The following ALERTS were generated. Each ALERT has the format

**test-name\_ALERT\_alert-type\_alert-level.**

Click on the hyperlinks for more details of the test.

### Alert level A

CHEMW03\_ALERT\_2\_A ALERT: The ratio of given/expected molecular weight as calculated from the \_atom\_site\* data lies outside the range 0.90 <> 1.10

From the CIF: \_cell\_formula\_units\_Z 8

From the CIF: \_chemical\_formula\_weight 989.79

TEST: Calculate formula weight from \_atom\_site\_\*

| atom | mass   | num   | sum    |
|------|--------|-------|--------|
| C    | 12.01  | 22.00 | 264.24 |
| H    | 1.01   | 31.00 | 31.25  |
| N    | 14.01  | 6.00  | 84.04  |
| Pd   | 106.42 | 1.00  | 106.42 |
| I    | 126.90 | 3.00  | 380.71 |

Calculated formula weight

866.67

**Author Response:** Attempts to refine peaks of residual electron density as disordered or partial-occupancy solvent acetonitrile nitrogen or carbon atoms were unsuccessful. The data were corrected for disordered electron density through use of the SQUEEZE procedure (Sluis, P. van der; Spek, A. L. Acta Crystallogr. 1990, A46, 194-201) as implemented in PLATON (Spek, A. L. Acta Crystallogr. 1990, A46, C34; Spek, A. L. J. Appl. Cryst. 2003, 36, 7-13. PLATON - a multipurpose crystallographic tool. Utrecht University, Utrecht, The Netherlands). A total solvent-accessible void volume of 1470 cubic Angstroms with a total electron count of 519 (consistent with 24 molecules of solvent acetonitrile, or 3 molecules per formula unit of the palladium complex) was found in the unit cell.

PLAT043\_ALERT\_1\_A Check Reported Molecular Weight ..... 989.79

**Author Response:** see response to CHEMW03.

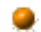

**Alert level B**

PLAT342\_ALERT\_3\_B Low Bond Precision on C-C Bonds ..... 0.0214 Ang

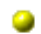

**Alert level C**

PLAT041\_ALERT\_1\_C Calc. and Reported SumFormula Strings Differ ?

**Author Response:** see response to CHEMW03.

PLAT042\_ALERT\_1\_C Calc. and Reported MoietyFormula Strings Differ ?

**Author Response:** see response to CHEMW03.

PLAT068\_ALERT\_1\_C Reported F000 Differs from Calcd (or Missing)... ?

**Author Response:** see response to CHEMW03.

PLAT234\_ALERT\_4\_C Large Hirshfeld Difference N5 -- C9 .. 0.16 Ang.  
 PLAT234\_ALERT\_4\_C Large Hirshfeld Difference C13 -- C14 .. 0.19 Ang.  
 PLAT242\_ALERT\_2\_C Check Low Ueq as Compared to Neighbors for C18  
 PLAT244\_ALERT\_4\_C Low 'Solvent' Ueq as Compared to Neighbors of C1S  
 PLAT250\_ALERT\_2\_C Large U3/U1 Ratio for Average U(i,j) Tensor .... 2.2  
 PLAT366\_ALERT\_2\_C Short? C(sp?)-C(sp?) Bond C9 - C10 ... 1.37 Ang.  
 PLAT366\_ALERT\_2\_C Short? C(sp?)-C(sp?) Bond C10 - C11 ... 1.37 Ang.

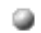

**Alert level G**

FORMU01\_ALERT\_2\_G There is a discrepancy between the atom counts in the  
 \_chemical\_formula\_sum and the formula from the \_atom\_site\* data.  
 Atom count from \_chemical\_formula\_sum: C28 H40 I3 N9 Pd1  
 Atom count from the \_atom\_site data: C22 H31 I3 N6 Pd1

**Author Response:** see response to CHEMW03.

CELLZ01\_ALERT\_1\_G Difference between formula and atom\_site contents detected.

**Author Response: see response to CHEMW03.**

CELLZ01\_ALERT\_1\_G ALERT: Large difference may be due to a  
symmetry error - see SYMMG tests  
From the CIF: \_cell\_formula\_units\_Z 8  
From the CIF: \_chemical\_formula\_sum C28 H40 I3 N9 Pd  
TEST: Compare cell contents of formula and atom\_site data

| atom | Z*formula | cif sites | diff  |
|------|-----------|-----------|-------|
| C    | 224.00    | 176.00    | 48.00 |
| H    | 320.00    | 248.00    | 72.00 |
| I    | 24.00     | 24.00     | 0.00  |
| N    | 72.00     | 48.00     | 24.00 |
| Pd   | 8.00      | 8.00      | 0.00  |

**Author Response: see response to CHEMW03.**

PLAT002\_ALERT\_2\_G Number of Distance or Angle Restraints on AtSite 6  
PLAT005\_ALERT\_5\_G No \_iucr\_refine\_instructions\_details in CIF .... ?  
PLAT072\_ALERT\_2\_G SHELXL First Parameter in WGHT Unusually Large. 0.12  
PLAT301\_ALERT\_3\_G Note: Main Residue Disorder ..... 10 Perc.  
PLAT606\_ALERT\_4\_G VERY LARGE Solvent Accessible VOID(S) in Structure !

**Author Response: see response to CHEMW03.**

PLAT710\_ALERT\_4\_G Delete 1-2-3 or 2-3-4 Linear Torsion Angle ... # 15  
I3 -PD -C1 -N1 175.00 4.00 1.555 1.555 1.555 1.555  
PLAT710\_ALERT\_4\_G Delete 1-2-3 or 2-3-4 Linear Torsion Angle ... # 18  
I3 -PD -C1 -N2 -7.00 5.00 1.555 1.555 1.555 1.555  
PLAT720\_ALERT\_4\_G Number of Unusual/Non-Standard Labels ..... 3  
PLAT860\_ALERT\_3\_G Note: Number of Least-Squares Restraints ..... 6  
PLAT869\_ALERT\_4\_G ALERTS Related to the use of SQUEEZE Suppressed !

**Author Response: see response to CHEMW03.**

---

2 **ALERT level A** = Most likely a serious problem - resolve or explain  
1 **ALERT level B** = A potentially serious problem, consider carefully  
10 **ALERT level C** = Check. Ensure it is not caused by an omission or oversight  
13 **ALERT level G** = General information/check it is not something unexpected

6 ALERT type 1 CIF construction/syntax error, inconsistent or missing data  
8 ALERT type 2 Indicator that the structure model may be wrong or deficient  
3 ALERT type 3 Indicator that the structure quality may be low  
8 ALERT type 4 Improvement, methodology, query or suggestion  
1 ALERT type 5 Informative message, check

---

## Datablock: 10b

---

Bond precision: C-C = 0.0069 A

Wavelength=0.71073

Cell: a=13.782(3) b=15.694(3) c=22.394(5)  
 alpha=79.906(3) beta=88.010(3) gamma=86.666(3)  
 Temperature: 173 K

|                | Calculated                                 | Reported                             |
|----------------|--------------------------------------------|--------------------------------------|
| Volume         | 4759.2(17)                                 | 4759.3(17)                           |
| Space group    | P -1                                       | P -1                                 |
| Hall group     | -P 1                                       | -P 1                                 |
| Moiety formula | 2(C38 H43 I2 N5 P Pd),<br>3(C2 H3 N), 2(I) | C38 H43 I2 N5 P Pd, 2(C2<br>H3 N), I |
| Sum formula    | C82 H95 I6 N13 P2 Pd2                      | C42 H49 I3 N7 P Pd                   |
| Mr             | 2298.85                                    | 1169.95                              |
| Dx,g cm-3      | 1.604                                      | 1.633                                |
| Z              | 2                                          | 4                                    |
| Mu (mm-1)      | 2.403                                      | 2.405                                |
| F000           | 2236.0                                     | 2280.0                               |
| F000'          | 2227.31                                    |                                      |
| h,k,lmax       | 17,20,29                                   | 17,20,29                             |
| Nref           | 22166                                      | 21838                                |
| Tmin,Tmax      | 0.450,0.866                                | 0.393,0.877                          |
| Tmin'          | 0.312                                      |                                      |

Correction method= NUMERICAL

Data completeness= 0.985 Theta(max)= 27.640

R(reflections)= 0.0351( 16825) wR2(reflections)= 0.0924( 21838)

S = 1.031 Npar= 951

The following ALERTS were generated. Each ALERT has the format

**test-name\_ALERT\_alert-type\_alert-level.**

Click on the hyperlinks for more details of the test.

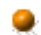

#### Alert level B

PLAT220\_ALERT\_2\_B Large Non-Solvent C Ueq(max)/Ueq(min) ... 4.4 Ratio

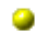

#### Alert level C

CHEMW03\_ALERT\_2\_C The ratio of given/expected molecular weight as  
 calculated from the \_atom\_site\* data lies outside  
 the range 0.99 <> 1.01

From the CIF: \_cell\_formula\_units\_Z 4

From the CIF: \_chemical\_formula\_weight 1169.95

TEST: Calculate formula weight from \_atom\_site\_\*

| atom | mass  | num   | sum    |
|------|-------|-------|--------|
| C    | 12.01 | 41.00 | 492.45 |
| H    | 1.01  | 47.50 | 47.88  |
| N    | 14.01 | 6.50  | 91.05  |

|                           |        |      |         |
|---------------------------|--------|------|---------|
| P                         | 30.97  | 1.00 | 30.97   |
| Pd                        | 106.42 | 1.00 | 106.42  |
| I                         | 126.90 | 3.00 | 380.71  |
| Calculated formula weight |        |      | 1149.49 |

**Author Response: Attempts to refine peaks of residual electron density as disordered or partial-occupancy solvent acetonitrile nitrogen or carbon atoms were unsuccessful. The data were corrected for disordered electron density through use of the SQUEEZE procedure (Sluis, P. van der; Spek, A. L. Acta Crystallogr. 1990, A46, 194-201) as implemented in PLATON (Spek, A. L. Acta Crystallogr. 1990, A46, C34; Spek, A. L. J. Appl. Cryst. 2003, 36, 7-13. PLATON - a multipurpose crystallographic tool. Utrecht University, Utrecht, The Netherlands). A total solvent-accessible void volume of 199 cubic Angstroms with a total electron count of 45(consistent with 2 molecule of solvent acetonitrile, or 0.5 molecule per formula unit of the palladium complex) was found in the unit cell.**

PLAT041\_ALERT\_1\_C Calc. and Reported SumFormula Strings Differ ?

**Author Response: see response to CHEMW03.**

PLAT042\_ALERT\_1\_C Calc. and Reported MoietyFormula Strings Differ ?

**Author Response: see response to CHEMW03.**

PLAT043\_ALERT\_1\_C Check Reported Molecular Weight ..... 1169.95

**Author Response: see response to CHEMW03.**

PLAT045\_ALERT\_1\_C Calculated and Reported Z Differ by ..... 0.50 Ratio  
 PLAT068\_ALERT\_1\_C Reported F000 Differs from Calcd (or Missing)... ?

**Author Response: see response to CHEMW03.**

|                   |                   |           |                                  |           |
|-------------------|-------------------|-----------|----------------------------------|-----------|
| PLAT220_ALERT_2_C | Large Non-Solvent | C         | Ueq(max)/Ueq(min) ...            | 3.5 Ratio |
| PLAT242_ALERT_2_C | Check Low         |           | Ueq as Compared to Neighbors for | C18A      |
| PLAT242_ALERT_2_C | Check Low         |           | Ueq as Compared to Neighbors for | C15B      |
| PLAT244_ALERT_4_C | Low               | 'Solvent' | Ueq as Compared to Neighbors of  | C1S       |
| PLAT244_ALERT_4_C | Low               | 'Solvent' | Ueq as Compared to Neighbors of  | C3S       |

---

### Alert level G

FORMU01\_ALERT\_2\_G There is a discrepancy between the atom counts in the  
   \_chemical\_formula\_sum and the formula from the \_atom\_site\* data.  
 Atom count from \_chemical\_formula\_sum: C42 H49 I3 N7 P1 Pd1  
 Atom count from the \_atom\_site data: C41 H47.5 I3 N6.5 P1 Pd1

**Author Response: see response to CHEMW03.**



CELLZ01\_ALERT\_1\_G Difference between formula and atom\_site contents detected.

**Author Response: see response to CHEMW03.**

CELLZ01\_ALERT\_1\_G ALERT: Large difference may be due to a  
symmetry error - see SYMMG tests  
From the CIF: \_cell\_formula\_units\_Z 4  
From the CIF: \_chemical\_formula\_sum C42 H49 I3 N7 P Pd  
TEST: Compare cell contents of formula and atom\_site data

| atom | Z*formula | cif sites | diff |
|------|-----------|-----------|------|
| C    | 168.00    | 164.00    | 4.00 |
| H    | 196.00    | 190.00    | 6.00 |
| I    | 12.00     | 12.00     | 0.00 |
| N    | 28.00     | 26.00     | 2.00 |
| P    | 4.00      | 4.00      | 0.00 |
| Pd   | 4.00      | 4.00      | 0.00 |

**Author Response: see response to CHEMW03.**

PLAT005\_ALERT\_5\_G No \_iucr\_refine\_instructions\_details in CIF .... ?  
PLAT154\_ALERT\_1\_G The su's on the Cell Angles are Equal ..... 0.00300 Deg.  
PLAT232\_ALERT\_2\_G Hirshfeld Test Diff (M-X) I1A -- PdA .. 9.0 su  
PLAT232\_ALERT\_2\_G Hirshfeld Test Diff (M-X) I2A -- PdA .. 8.5 su  
PLAT232\_ALERT\_2\_G Hirshfeld Test Diff (M-X) I2B -- PdA .. 7.5 su  
PLAT244\_ALERT\_4\_G Low 'Solvent' Ueq as Compared to Neighbors of C7S  
PLAT302\_ALERT\_4\_G Note: Anion/Solvent Disorder ..... 27 Perc.  
PLAT380\_ALERT\_4\_G Check Incorrectly? Oriented X(sp2)-Methyl Moiety C8B  
PLAT432\_ALERT\_2\_G Short Inter X...Y Contact N3S .. C8S .. 3.00 Ang.  
PLAT605\_ALERT\_4\_G Structure Contains Solvent Accessible VOIDS of . 199 A\*\*3

**Author Response: see response to CHEMW03.**

PLAT710\_ALERT\_4\_G Delete 1-2-3 or 2-3-4 Linear Torsion Angle ... # 3  
I1A -PDA -P1A -C21A 176.50 0.30 1.555 1.555 1.555 1.555  
PLAT710\_ALERT\_4\_G Delete 1-2-3 or 2-3-4 Linear Torsion Angle ... # 6  
I1A -PDA -P1A -C31A -60.80 0.40 1.555 1.555 1.555 1.555  
PLAT710\_ALERT\_4\_G Delete 1-2-3 or 2-3-4 Linear Torsion Angle ... # 9  
I1A -PDA -P1A -C41A 58.30 0.40 1.555 1.555 1.555 1.555  
PLAT710\_ALERT\_4\_G Delete 1-2-3 or 2-3-4 Linear Torsion Angle ... # 23  
I2A -PDA -C1A -N1A -165.20 1.20 1.555 1.555 1.555 1.555  
PLAT710\_ALERT\_4\_G Delete 1-2-3 or 2-3-4 Linear Torsion Angle ... # 26  
I2A -PDA -C1A -N2A 9.50 1.70 1.555 1.555 1.555 1.555  
PLAT710\_ALERT\_4\_G Delete 1-2-3 or 2-3-4 Linear Torsion Angle ... # 115  
I1B -PDB -P1B -C21B 149.90 0.30 1.555 1.555 1.555 1.555  
PLAT710\_ALERT\_4\_G Delete 1-2-3 or 2-3-4 Linear Torsion Angle ... # 118  
I1B -PDB -P1B -C31B -87.10 0.30 1.555 1.555 1.555 1.555  
PLAT710\_ALERT\_4\_G Delete 1-2-3 or 2-3-4 Linear Torsion Angle ... # 121  
I1B -PDB -P1B -C41B 32.40 0.30 1.555 1.555 1.555 1.555  
PLAT710\_ALERT\_4\_G Delete 1-2-3 or 2-3-4 Linear Torsion Angle ... # 135  
I2B -PDB -C1B -N1B -162.30 0.80 1.555 1.555 1.555 1.555  
PLAT710\_ALERT\_4\_G Delete 1-2-3 or 2-3-4 Linear Torsion Angle ... # 138  
I2B -PDB -C1B -N2B 11.60 1.40 1.555 1.555 1.555 1.555  
PLAT720\_ALERT\_4\_G Number of Unusual/Non-Standard Labels ..... 36  
PLAT869\_ALERT\_4\_G ALERTS Related to the use of SQUEEZE Suppressed !

**Author Response: see response to CHEMW03.**

---

0 **ALERT level A** = Most likely a serious problem - resolve or explain  
1 **ALERT level B** = A potentially serious problem, consider carefully  
11 **ALERT level C** = Check. Ensure it is not caused by an omission or oversight  
25 **ALERT level G** = General information/check it is not something unexpected

8 ALERT type 1 CIF construction/syntax error, inconsistent or missing data  
10 ALERT type 2 Indicator that the structure model may be wrong or deficient  
0 ALERT type 3 Indicator that the structure quality may be low  
18 ALERT type 4 Improvement, methodology, query or suggestion  
1 ALERT type 5 Informative message, check

---

---

It is advisable to attempt to resolve as many as possible of the alerts in all categories. Often the minor alerts point to easily fixed oversights, errors and omissions in your CIF or refinement strategy, so attention to these fine details can be worthwhile. In order to resolve some of the more serious problems it may be necessary to carry out additional measurements or structure refinements. However, the purpose of your study may justify the reported deviations and the more serious of these should normally be commented upon in the discussion or experimental section of a paper or in the "special\_details" fields of the CIF. checkCIF was carefully designed to identify outliers and unusual parameters, but every test has its limitations and alerts that are not important in a particular case may appear. Conversely, the absence of alerts does not guarantee there are no aspects of the results needing attention. It is up to the individual to critically assess their own results and, if necessary, seek expert advice.

**Publication of your CIF in IUCr journals**

A basic structural check has been run on your CIF. These basic checks will be run on all CIFs submitted for publication in IUCr journals (*Acta Crystallographica*, *Journal of Applied Crystallography*, *Journal of Synchrotron Radiation*); however, if you intend to submit to *Acta Crystallographica Section C* or *E*, you should make sure that full publication checks are run on the final version of your CIF prior to submission.

**Publication of your CIF in other journals**

Please refer to the *Notes for Authors* of the relevant journal for any special instructions relating to CIF submission.

---

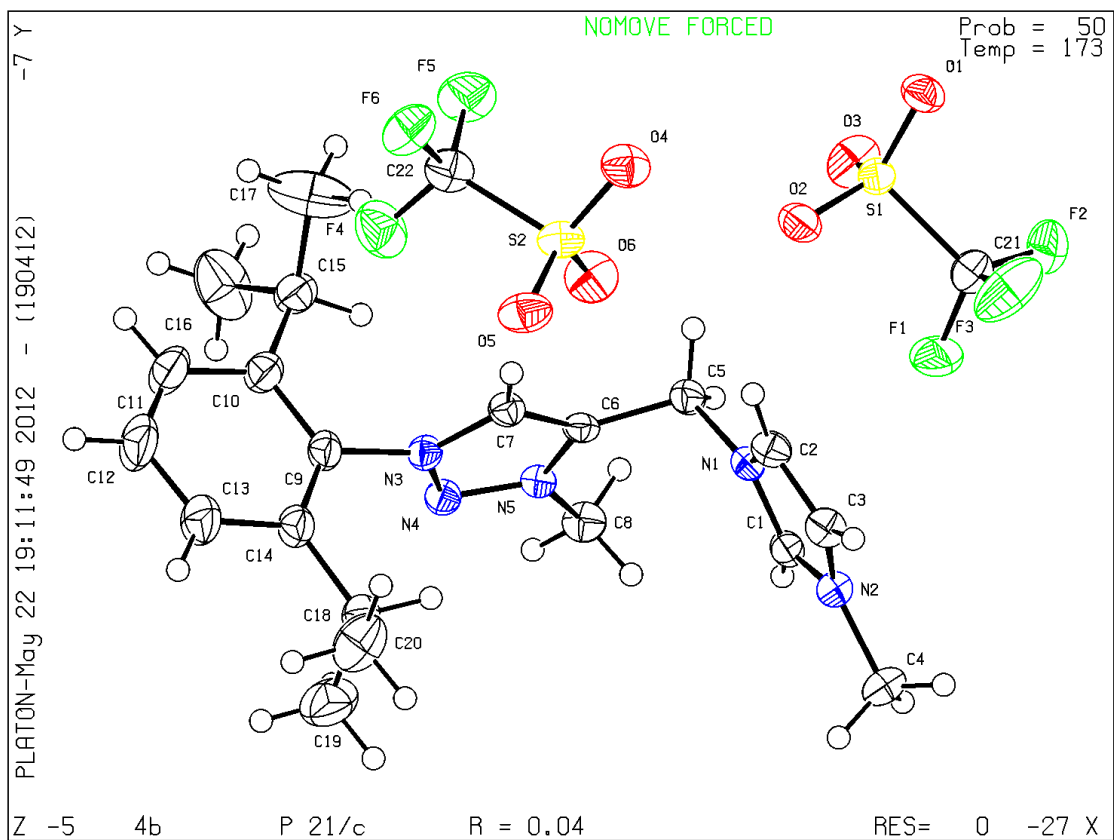

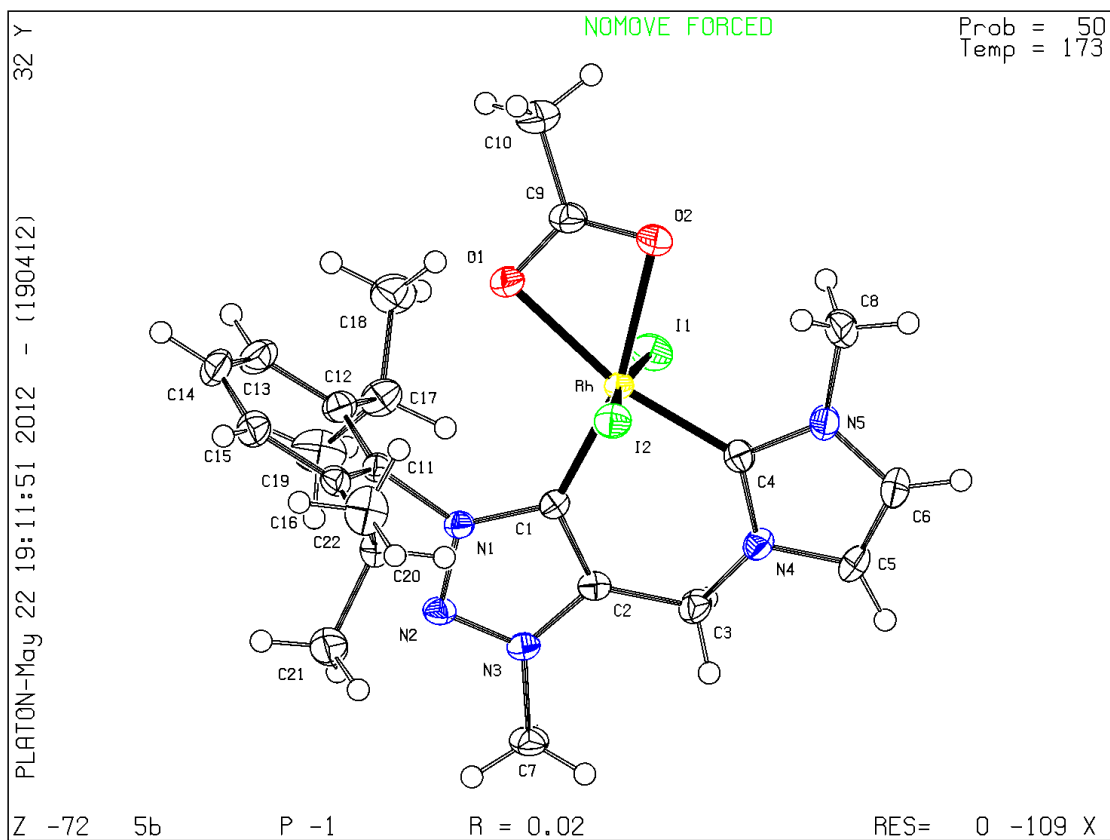

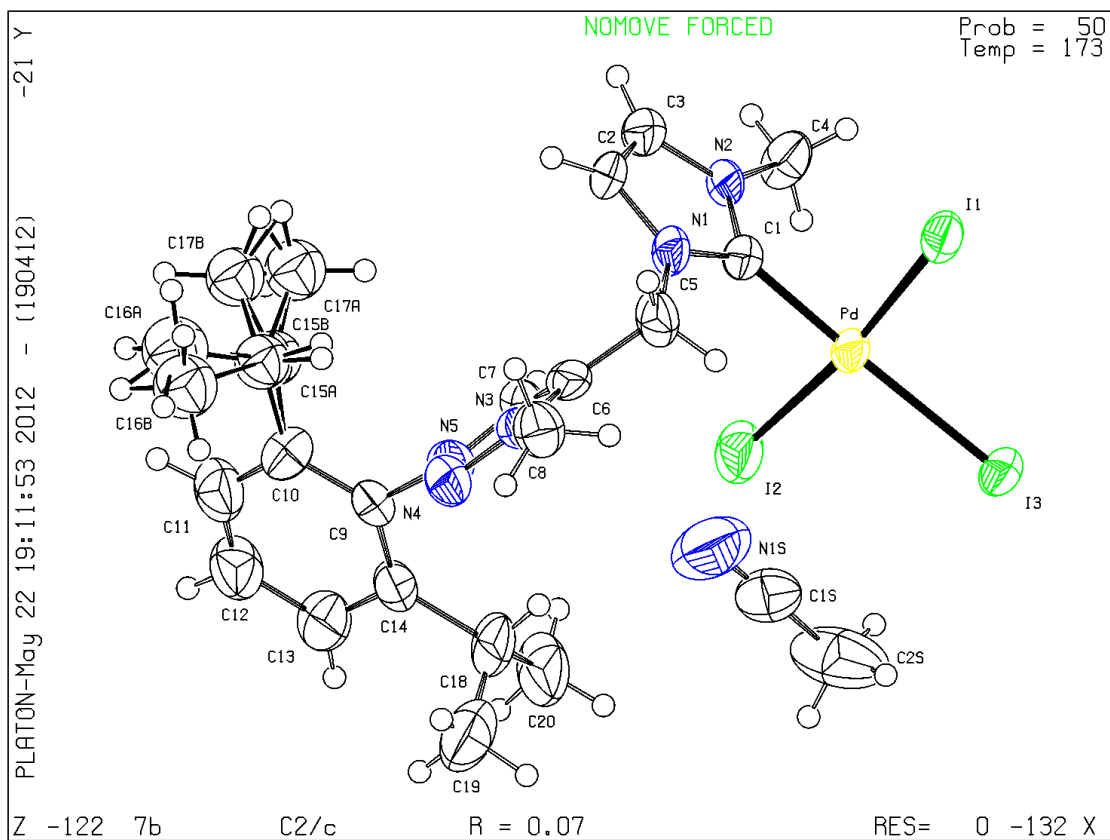

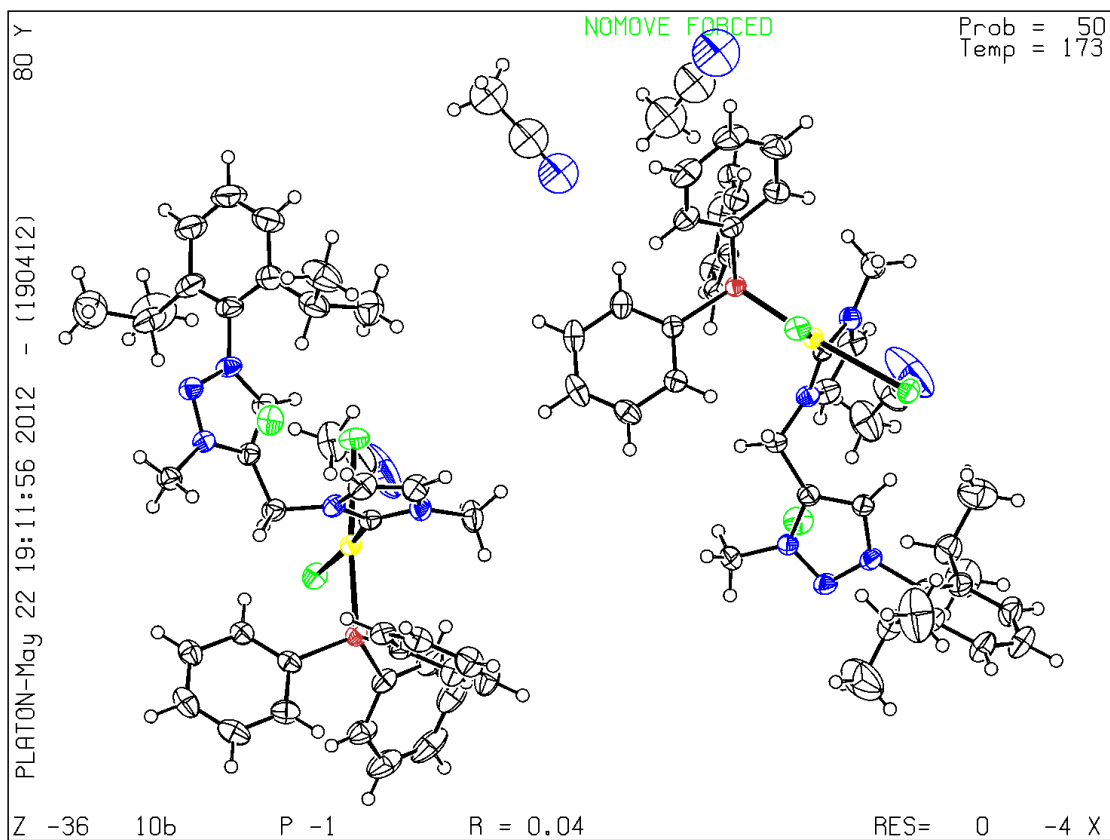

Supplement: Supplementary file 1 [file 4140079]
